# Supplementary material
Source: MDPI journal article supplement (https://www.mdpi.com/2076-3417/11/3/1346)

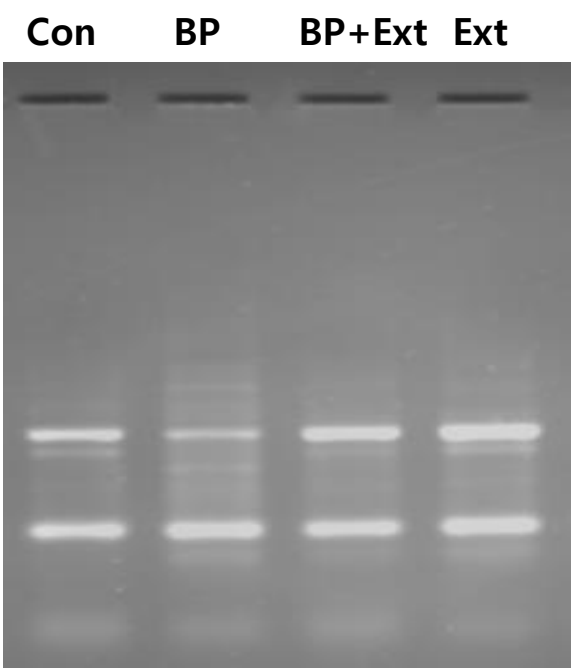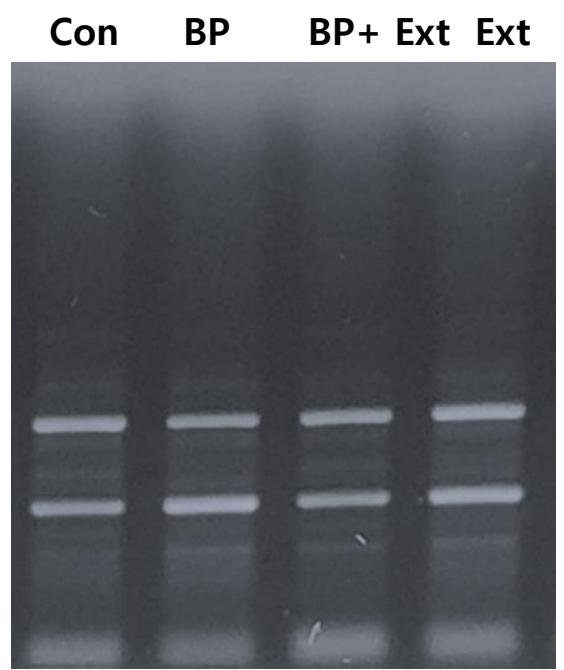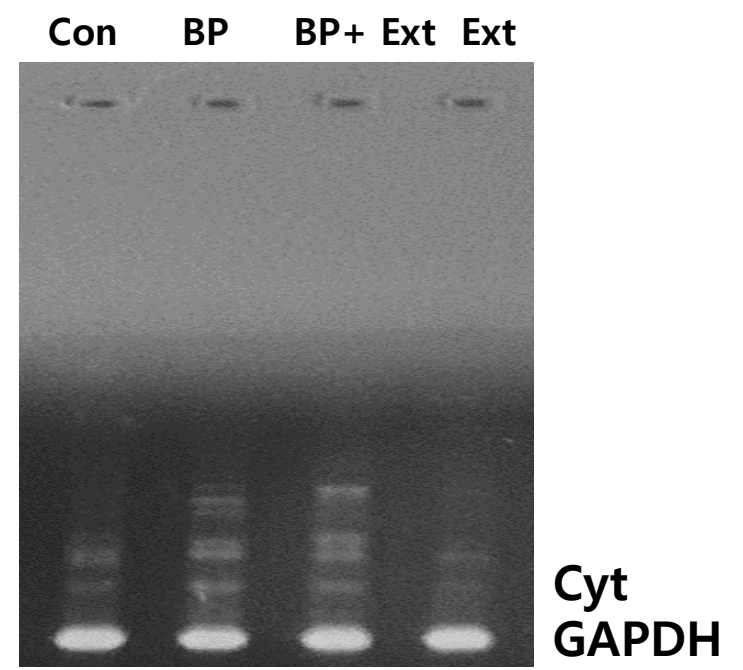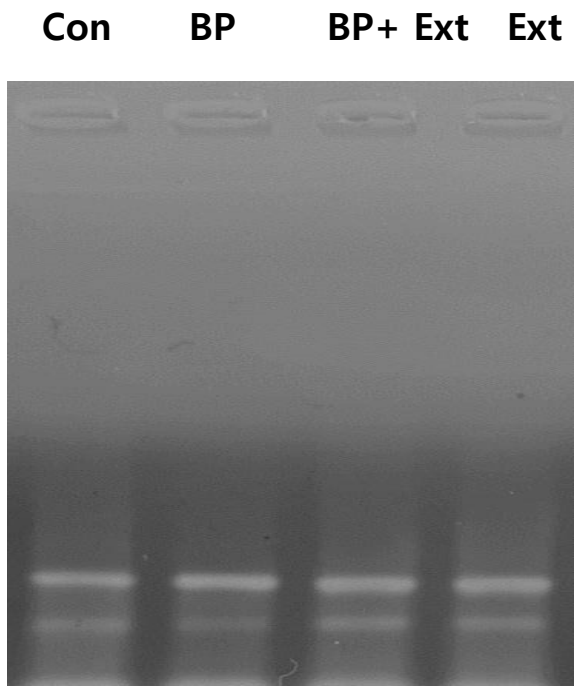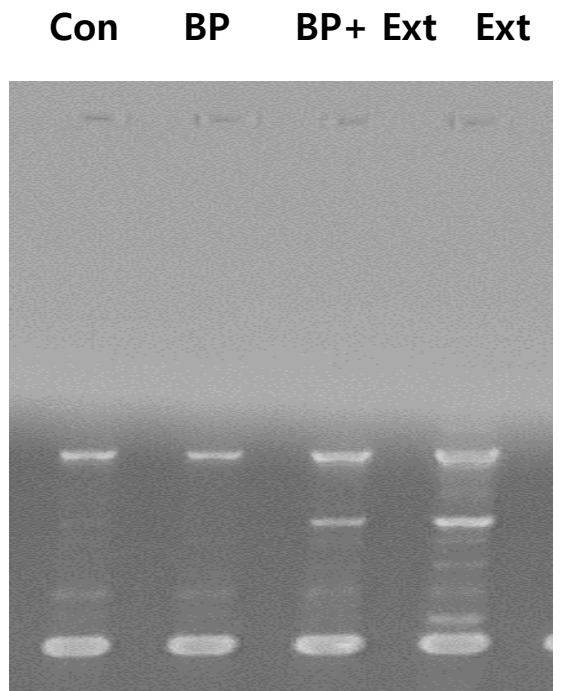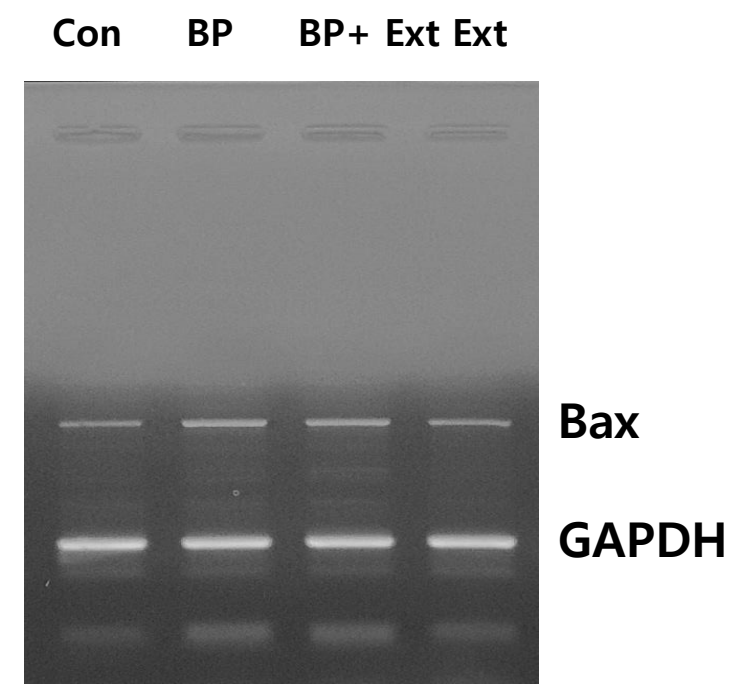

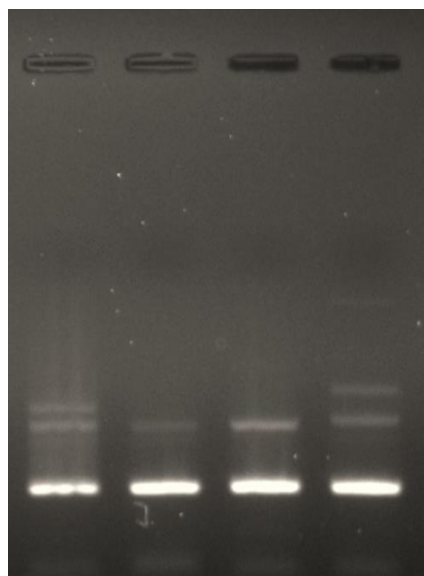

**Runx2**

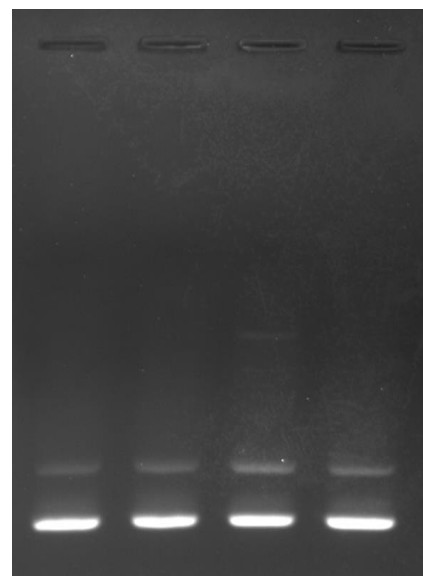

**Dlx5**

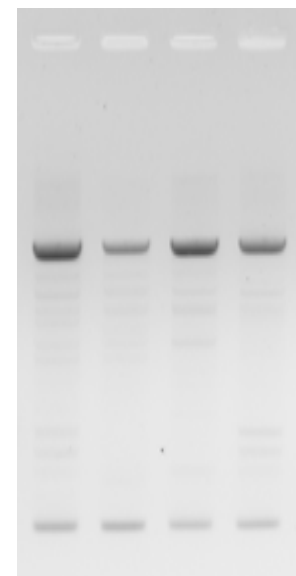

**VEGF**

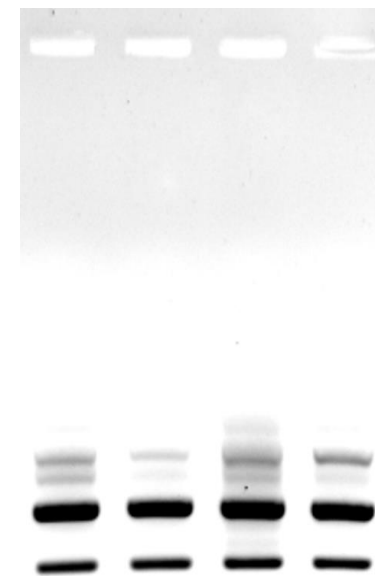

**BMP6**

**SAMD4**

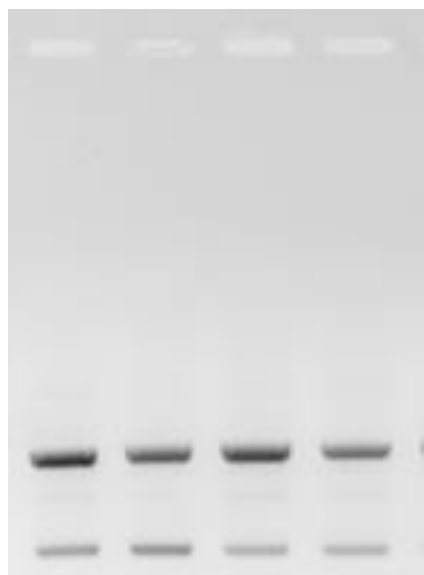

**COL1A1**

Supplement: s1 [file s1]
